# Supplementary material
Source: MDPI journal article supplement (https://www.mdpi.com/2073-4395/12/8/1873)
Supplement: s1 [file s1]

**Table S1 : primers used for T-DNA construct validation**

| Target | Name   | Forward primer           |        | Reverse primer          |  |
|--------|--------|--------------------------|--------|-------------------------|--|
|        |        | 5'-3' sequence           | Name   | 5'-3' sequence          |  |
| ELF3a  | LG1051 | ATTGCATCATTCACATGAAGCCG  | LG1052 | AAACCGGCTTCATGTGAATG/   |  |
| ELF3b  | LG1055 | ATTGTCCTTCTCAATACCACTCT  | LG1056 | AAACAGAGTGGTATTGAGAA    |  |
| LHP1a  | LG1081 | ATTGAGGATATGAAAGGGGCAAG  | LG1082 | AAACCTTGCCCCCTTTCATATC/ |  |
| LHP1b  | LG1085 | ATTGGGTTTGTTCAGTGACGACGG | LG1086 | AAACCCGTCGTCACTGACAA/   |  |
| FLCa   | LG1091 | ATTGCTGTAGAGCTTGCCGGAGG  | LG1092 | AAACCCCTCCGGCAAGCTCTAC/ |  |
| FLCb   | LG1095 | ATTGGCTGATGATCTCAAAGCCT  | LG1096 | AAACAGGCTTTGAGATCATC/   |  |
| TFL1a  | LG1101 | ATTGAATGTAGCATCTGTTGTAC  | LG1102 | AAACGTACAACAGATGCTAC    |  |
| TFL1b  | LG1105 | ATTGAATTGCCAAGGCCAAGCAT  | LG1106 | AAACATGCTTGGCCTTGGCA/   |  |
| SVPa   | LG1111 | ATTGTTCTTTACTCATTTCGGGCG | LG1112 | AAACCGCCCGAATGAGTAAA    |  |
| SVPb   | LG1115 | ATTGCGGGTCAAACCAGCTTCAA  | LG1116 | AAACTTGAAGCTGGTTTGACC   |  |

**Table S2 : Line and plant naming and pedigree**

| <b>T4 line names*</b> | <b>T4 line pedigree*</b> | <b>T5 plant names**</b> | <b>T5 plant pedigree**</b>          |
|-----------------------|--------------------------|-------------------------|-------------------------------------|
| A40-24                | 6-1-104-40-24            | A40-24-25               | 6-1-104-40-24-25                    |
| A4-12                 | 6-1-111-4-12             | A4-12-25                | 6-1-111-4-12-25<br>6-1-111-4-12 -26 |
| A4-19                 | 6-1-111-4-19             | A4-19-25<br>A4-19-26    | 6-1-111-4-19-25<br>6-1-111-4-19-26  |
| A1-14                 | 6-1-112-1-14             | A1-14-25                | 6-1-112-1-14-25                     |
| B1-2                  | 6-2-109-1-2              | B1-2-25                 | 6-2-109-1-2-25                      |
| B23-3                 | 6-2-3-23-3               | B23-3-25                | 6-2-3-23-3-25                       |
| B28-12                | 6-2-7-28-12              |                         |                                     |
| B33-8                 | 6-2-7-33-8               |                         |                                     |
| B1-11                 | 6-2-12-1-11              |                         |                                     |
| B20-2                 | 6-2-109-20-2             |                         |                                     |
| C2-23                 | 6-3-9-2-23               |                         |                                     |
| C16-4                 | 6-3-12-16-4              |                         |                                     |
| C16-9                 | 6-3-12-16-9              |                         |                                     |
| C27-4                 | 6-3-14-27-4              |                         |                                     |
| C2-19                 | 6-3-120-2-19             | C2-19-25                | 6-3-120-2-19-25                     |
| A1-4                  | 6-1-112-1-4              |                         |                                     |
| B33-8                 | 6-2-7-33-8               |                         |                                     |

\* T4 lines are listed in Table1

\*\* T5 plants used for genotyping are listed in Table2

Principle of line/plant numbering : First number, construct number (Flo6); second number, T1 parent line; third number, T2 parent line; fourth number, T3 parent line; fifth number, T4 parent line; Sixth number, T5 plant

Table S3. Primers used for amplification and sequencing

| Gene       | SVP    |               |        | FLC sgRNA-a |         |         | FLC sgRNA-b |        |        |
|------------|--------|---------------|--------|-------------|---------|---------|-------------|--------|--------|
| Subgenome  | SG-1   | SG-2          | SG-3   | SG-1        | SG-2    | SG-3    | SG-1        | SG-2   | SG-3   |
| Fwd primer | LG1720 | SVP-F3        | LG1720 | LG1750      | LG1750  | LG1750  | LG1776      | LG1775 | LG1773 |
| Rev primer | LG2475 | SVP-R2        | LG2473 | LG1755      | LG1756  | LG1753  | LG1770      | LG1770 | LG1770 |
| Seq primer | LG1728 | TA<br>Cloning | LG1728 | LG 1758     | LG 1758 | LG 1758 | LG1770      | LG1770 | LG1770 |

| Gene       | LHP1   |        |        | TFL1   |        |        | ELF3    |         |         |
|------------|--------|--------|--------|--------|--------|--------|---------|---------|---------|
| Subgenome  | SG-1   | SG-2   | SG-3   | SG-1   | SG-2   | SG-3   | SG-1    | SG-2    | SG-3    |
| Fwd primer | LG1740 | LG1740 | LG1740 | LG1713 | LG1716 | LG1714 | LG1680  | LG1680  | LG1680  |
| Rev primer | LG1744 | LG1747 | LG1743 | LG1711 | LG1711 | LG1711 | LG2234  | LG2236  | LG2232  |
| Seq primer | LG1748 | LG1748 | LG1748 | LG1711 | LG1711 | LG1711 | LG 1688 | LG 1688 | LG 1688 |

Table S4. Primer sequences

| <i>C. Sativa</i> primers |                           |
|--------------------------|---------------------------|
| Name                     | 5'-3' Sequence            |
| SVP-LG1720               | AGCCATCTCTTGAGTTACAGGT    |
| SVP-LG1728               | GCATTCTGTTATTGCCTACGATT   |
| SVP-LG2473               | CCCTAGGGAGTGGACTACCGT     |
| SVP-LG2475               | CGAGAATGTGCAAATTGAACGC    |
| SVP-F3                   | GTAGAAGTGATGAATGGATGC     |
| SVP-R2                   | TCTTTGAAGTTCGCTGATCTC     |
| FLC-LG1750               | CTCTCGGAGACTGAAGCCAT      |
| FLC-LG1753               | CGACATTGTTCTTCCATAGATTCA  |
| FLC-LG1755               | ACGGCTTGAAACTTCACTAAACGG  |
| FLC-LG1756               | GCAGAACGTGTCAAGCAAATCTTG  |
| FLC-LG1758               | GTCACCTTCTCCAAACGTCG      |
| FLC-LG1770               | CCTGGCCAAAGAAAAGGGAC      |
| FLC-LG1773               | TCCAGTGGTCTTTTCAAGGGTTGC  |
| FLC-LG1775               | CTCATAGTTTCCAGTGGTCTTTCG  |
| FLC-LG1776               | AGCCTGGTCAAGATCCTTGATCAT  |
| LHP-LG1740               | GGTCAGGTCTTCTTCCAGCA      |
| LHP-LG1743               | TCGAAATAGCCTTCATCAAGCTCT  |
| LHP-LG1744               | TACTCTTCACCATCCTCCGTACAT  |
| LHP-LG1747               | GCTTCGATTTTCGAAATACCCTTTG |
| LHP-LG1748               | TGCTTCTCCTTCTTCTCTCCA     |
| TFL1-LG1711              | ACTCGACCGCAAATTTACGA      |
| TFL1-LG1713              | ACTTGGGGGCCCATATCCCATATAA |
| TFL1-LG1714              | TTTCTTTACTTTCCTGTTTATTGT  |
| TFL1-LG1716              | AATTCATTTTTACCTTTTTTGCC   |
| ELF3-LG1680              | CGTAGTCGGTGGGTTAAGTT      |
| ELF3-LG1688              | GCTTGTTGTTGCTAAATTCGGT    |
| ELF3-LG2232              | ACAAAGCCACCTGACTTTTC      |
| ELF3-LG2234              | GCTCCCTACCCTCAAGGTGC      |
| ELF3-LG2236              | TTCCCTCTGTGACTGATAGG      |
| EF1-AFor                 | CCACGAGTCTGTTCTTGAGGC     |
| EF1-ARev                 | CATTTGGCACCCCTTCTTCAC     |

[illegible]

Table S5 : Compilation of transcriptomic data concerning the genes targeted for knockout

| Gene        | <i>A. thaliana</i> <sup>a</sup> | <i>C. sativa</i> <sup>b</sup> | genotype<br>CO46 <sup>c</sup> | genotype<br>DH55 <sup>d</sup> |
|-------------|---------------------------------|-------------------------------|-------------------------------|-------------------------------|
| <i>SVP</i>  | At2g22540                       | Csa16g044290                  | 12,192                        | 7.28                          |
|             |                                 | Csa09g086860                  | 21,552                        | 10.44                         |
|             |                                 | Csa07g052630                  | 21,103                        | 10.87                         |
| <i>FLC</i>  | At5g10140                       | Csa08g054450                  | 43,364                        | 15.38                         |
|             |                                 | Csa20g015400                  | 3,772                         | 0.88                          |
|             |                                 | Csa13g011890                  | 0,987                         | 0.00                          |
| <i>TFL1</i> | At5g03840                       | Csa20g005030                  | 1,479                         | 0.10                          |
|             |                                 | Csa08g060650                  | 0,184                         | 0.00                          |
|             |                                 | Csa13g003940                  | 3,824                         | 0.00                          |
| <i>LHP1</i> | At5g17690                       | Csa20g025860                  | 3,082                         | 1.15                          |
|             |                                 | Csa13g020480                  | 5,227                         | 2.64                          |
|             |                                 | Csa08g009910                  | 3,973                         | 1.43                          |
| <i>ELF3</i> | At2g25930                       | Csa16g047550                  | 7,541                         | 9.34                          |
|             |                                 | Csa09g092140                  | 13,567                        | 15.60                         |
|             |                                 | Csa07g056950                  | 5,688                         | 2.59                          |

a: Position of gene in *A. thaliana* genome (TAIR)

b: Position of gene in *C. sativa* genome (Kagale *et al.* 2014)

c: Transcript abundance in young leaves (Anderson *et al.* 2019)

d: Transcript abundance in young leaves (Kagale *et al.* 2016)

Table S6 : Floraison-6 target genes, subgenomes, sgRNAs used to mutate genes

| Gene          | Accession    | Position<br>chromosome | Sub-<br>genome | sgRNA a                            | sgRNA b                            |
|---------------|--------------|------------------------|----------------|------------------------------------|------------------------------------|
| <i>CsELF3</i> | XM_010474320 | Csa16g047550           | g1             |                                    |                                    |
|               | XM_010419071 | Csa07g056950           | g2             | 332rev<br>GCATCATTACATGAAGCCG AGG  | 714rev<br>TTCCTTCTCAATACCACTCT TGG |
|               | XM_010431310 | Csa09g092140           | g3             |                                    |                                    |
| <i>CsFLC</i>  | XM_010454736 | Csa13g011890           | g1             |                                    |                                    |
|               | XM_010424583 | Csa08g054450           | g2             | 299rev<br>GCTGTAGAGCTTGCCGAGG CGG  | 395for<br>TGCTGATGATCTCAAAGCCT TGG |
|               | XM_010493366 | Csa20g015400           | g3             |                                    |                                    |
| <i>CsLHP1</i> | XM_010455670 | Csa13g020480           | g1             |                                    |                                    |
|               | XM_019228312 | Csa08g009910           | g2             | 245for<br>GAGGATATGAAAGGGCAAG TGG  | 368for<br>GGGTTTGTCACTGACGACGG CGG |
|               | XM_010494428 | Csa20g025860           | g3             |                                    |                                    |
| <i>CsTFL1</i> | XM_010453977 | Csa13g003940           | g1             |                                    |                                    |
|               | XM_010425355 | Csa08g060650           | g2             | 395rev<br>AAATGTAGCATCTGTTGTAC CGG | 459for<br>GAATTGCCAAGGCCAAGCAT AGG |
|               | XM_010492576 | Csa20g005030           | g3             |                                    |                                    |
| <i>CsSVP</i>  | XM_010473941 | Csa16g044290           | g1             |                                    |                                    |
|               | XM_010418712 | Csa07g052630           | g2             | 390rev<br>TTTCTTTACTCATTGGGCG TGG  | 500rev<br>GCGGGTCAAACCAGCTTCAA GGG |
|               | XM_010430875 | Csa09g086860           | g3             |                                    |                                    |

Table S7 : Progressive appearance of phenotypes

| <b>Generation</b> | <b>Number of Populations screened</b> | <b>Number of Plants per population</b> | <b>Phenotypes observed</b>                                                                                                            |
|-------------------|---------------------------------------|----------------------------------------|---------------------------------------------------------------------------------------------------------------------------------------|
| T1                | 14                                    | 1                                      | - Early flowering                                                                                                                     |
| T2                | 6                                     | 24                                     | - Early flowering                                                                                                                     |
| T3                | 87                                    | 48                                     | - Early flowering<br>- late flowering<br>- Short stature<br>- Determinate growth<br>- Increased basal branching                       |
| T4                | 34                                    | 24                                     | - Early flowering<br>- late flowering<br>- Short stature<br>- Determinate growth<br>- Increased basal branching<br>- extreme dwarfism |
| T5                | 15                                    | 24                                     | - No new phenotypes                                                                                                                   |

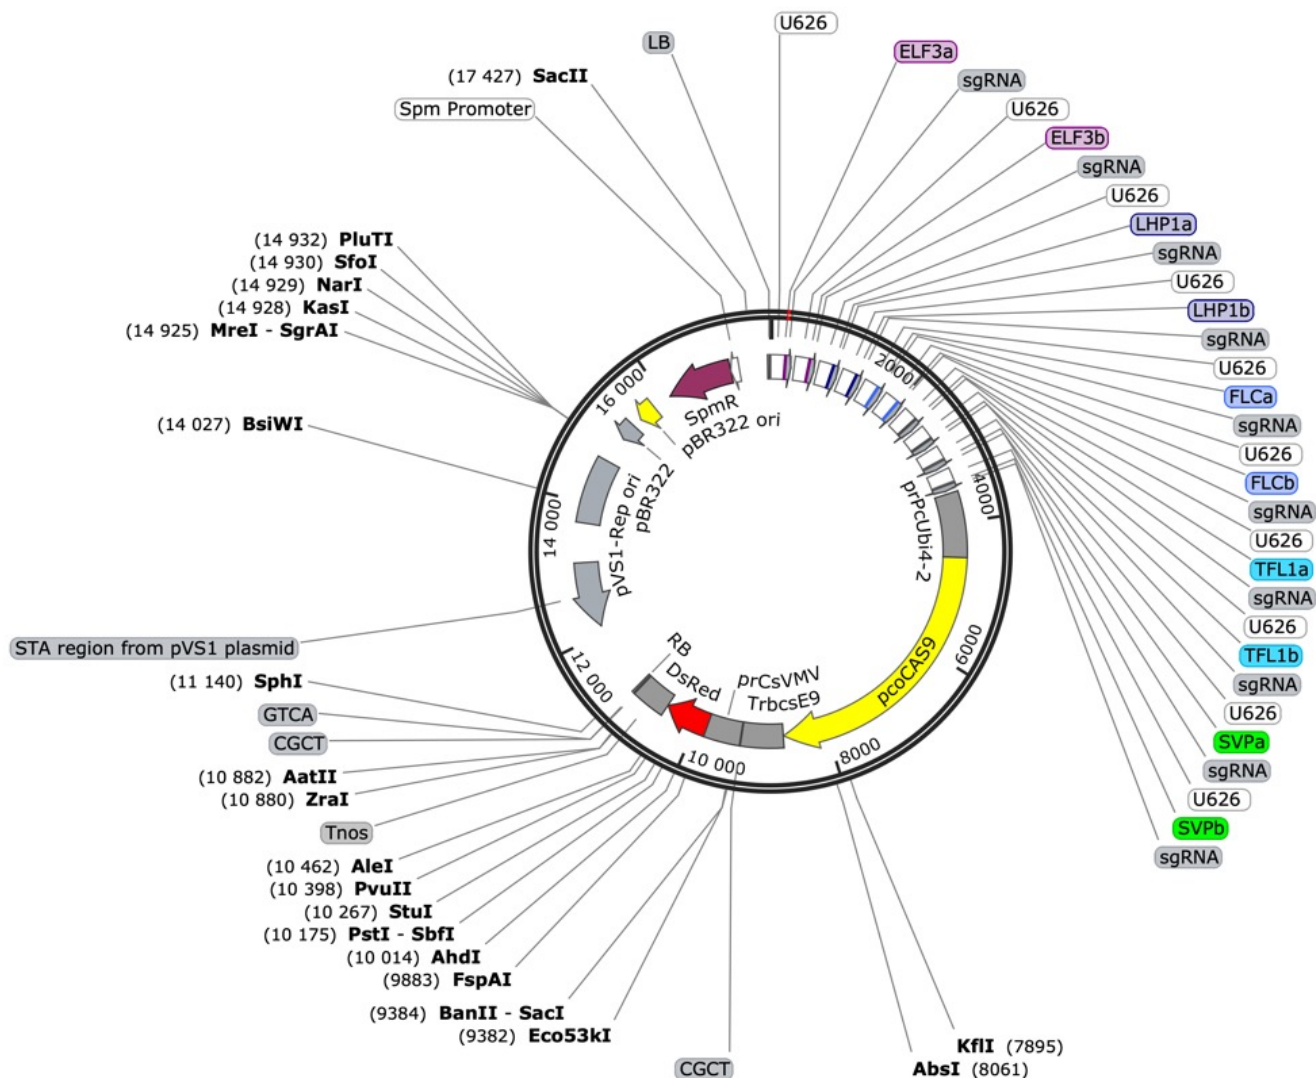

**Figure S1. Structure of binary plasmid carrying TDNA with sgRNA, Cas and DsRED marker.**

GoldenBraid II technology was used to assemble the vector pFlo6, in which, between the left and right T-DNA border sequences are: ten sgRNA sequences transcribed from the U6-26 promoter, the pcoCas9 coding sequence between the parsley ubiquitin 4 (PcUbi4\_2) promoter and the pea RbcsE9 terminator, and the DsRed coding sequence between the Cassava vein mosaic virus (CaVMV) promoter and the *A. tumefaciens* Nos terminator.

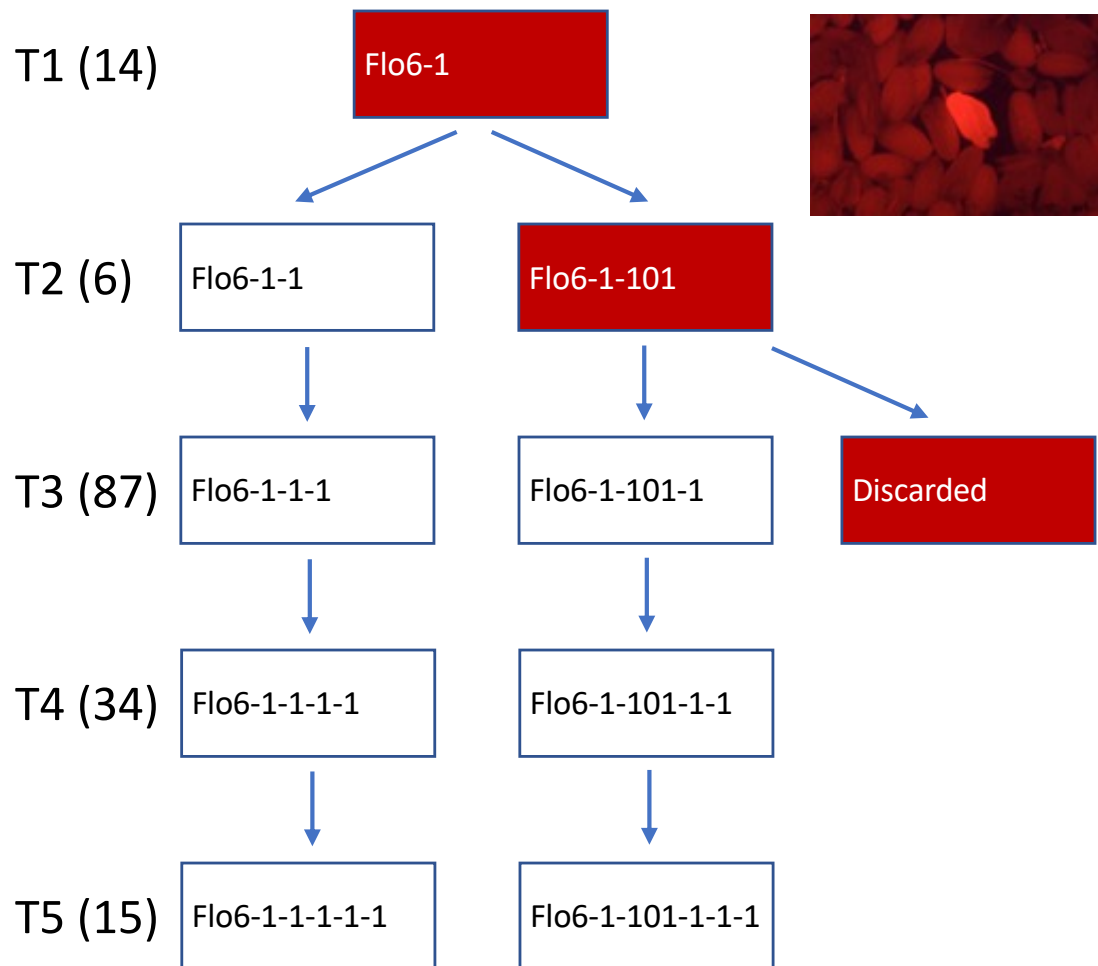

**Figure S2. Geneology of edited camelina populations.** The different generation (T) are indicated with the number of family analyzed in bracket. T1 corresponds to the initial transformed seeds borne by the plants treated by floral dip (as illustrated in the photo). Transgenic (DsRed-positive) plants are indicated by red boxes, and non-transgenic (DsRed-negative) segregants are indicated in white boxes. Successive generations of progeny through the T5 generation were produced by single-seed descent, with each plant designated by an additional number incremented at each generation. 24 plants were phenotyped at the T2, T4, and T5 generations, and 48 plants at the T3.

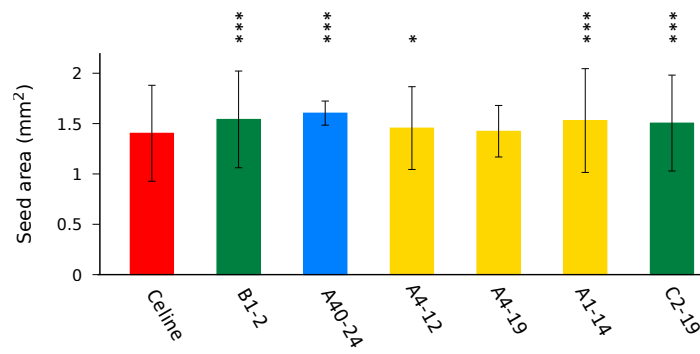

**Figure S3. Phenotype of T5 plants.** Seed size, expressed as surface area, was determined on samples of seeds borne by T5 plants. Values shown are means  $\pm$  SEM.  $n = 430, 480, 685, 506, 788, 634,$  and  $482,$  from left to right, respectively.  
Student test \*\*\*  $P < 0.001$ ; \*\*  $P < 0.01$ ; \*  $P < 0.05$ .
